# Supplementary material
Source: Springer Nature journal article supplement (https://www.springermedizin.de/resource/supplementary/12889_2012_4848_MOESM2_ESM.pdf/9493956)

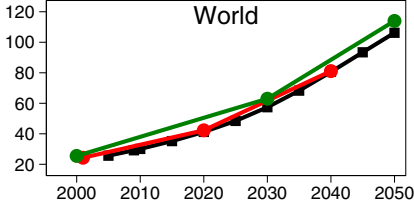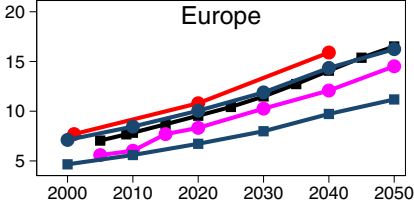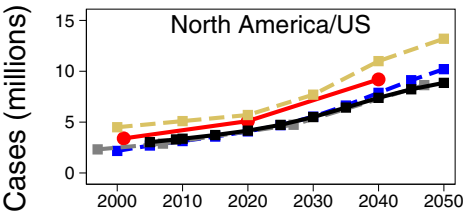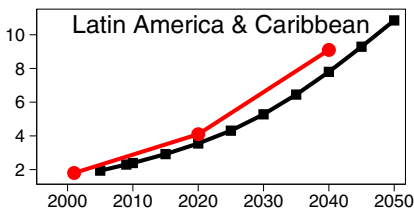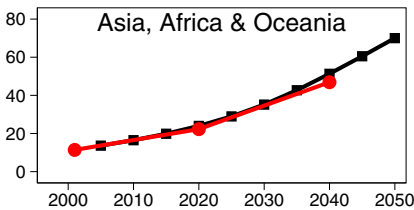

- Brookmeyer (1998)
- Wimo (2002)
- Wancata (2003)
- Brookmeyer (2007)
- Sloane (2002)
- Hebert (2003)
- Ferri (2005)
- Mura (2010)

Supplement: MOESM2 [file 9493956]
